# Supplementary material for: Construction of hollow In2S3/CdIn2S4heterostructures with high efficiency for Cr(vi) reduction
Source: Royal Society of Chemistry journal article supplement (doi:10.1039/d1en00081k), 2021-01-01
Supplement: d1en00081k1.pdf [file d1en00081k1.pdf]

## Electronic Supplementary Material

### Construction of hollow $\text{In}_2\text{S}_3/\text{CdIn}_2\text{S}_4$ heterostructure with high efficiency for Cr(VI) reduction

Cheng Cheng, Dongyun Chen,\* Najun Li, Qingfeng Xu, Hua Li, Jinghui He and Jianmei Lu\*

*Collaborative Innovation Center of Suzhou Nano Science and Technology, College of  
Chemistry Chemical Engineering and Materials Science Soochow University, 199 Ren'ai  
Road, Suzhou 215123, P.R. China*

#### Table of Contents

**S1.** Mapping image of IS/CIS-10.

**S2.** Photoluminescence spectra of  $\text{In}_2\text{S}_3$  and IS/CIS-5,10 and  $\text{CdIn}_2\text{S}_4$ .

**S3.** SEM image of IS/CIS-10-AF.

**S4.** SEM and TEM image of  $\text{CdIn}_2\text{S}_4$

**Table S1.** The content of ions ( $\text{Cd}^{2+}$ ,  $\text{In}^{3+}$  and  $\text{Cr}^{3+}$ ) after every cycling photocatalytic reduction of Cr(VI) using IS/CIS-10 sample.

**S1.** Mapping image of IS/CIS-10.

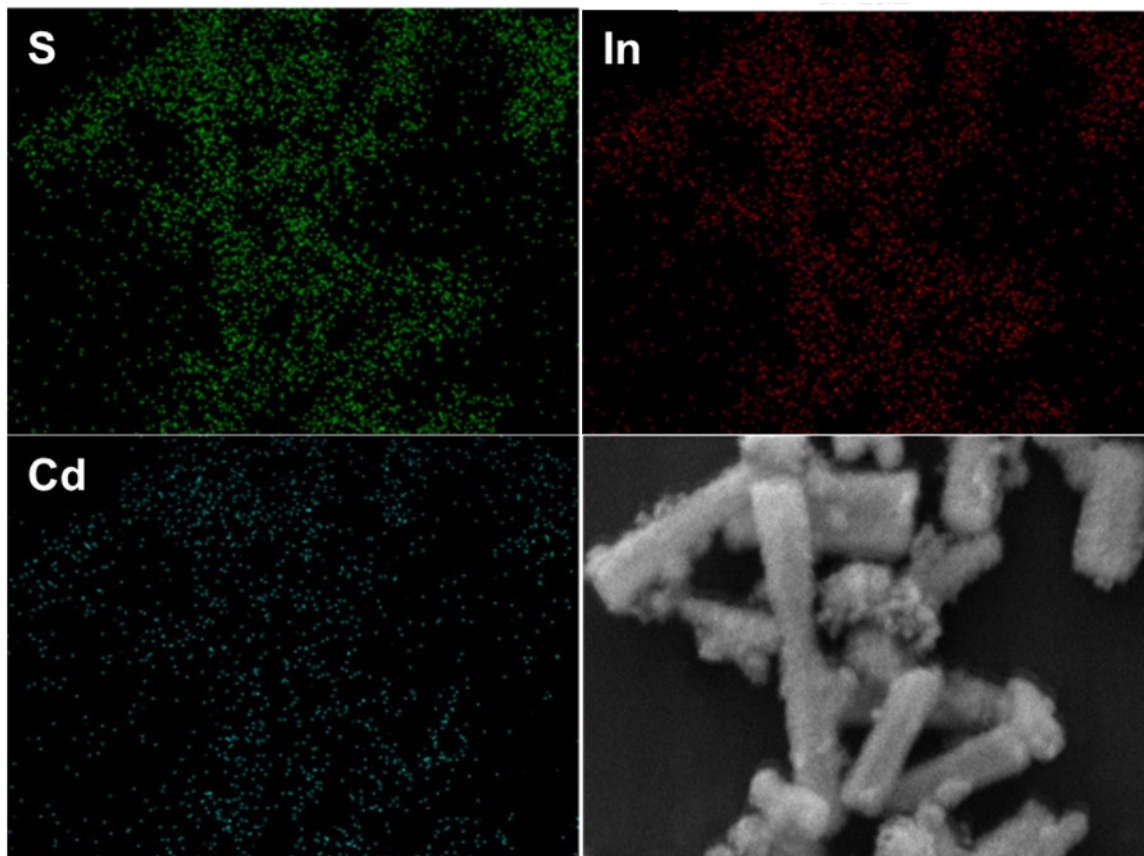

**Figure S1.** Mapping image of IS/CIS-10.

S2. Photoluminescence spectra of  $\text{In}_2\text{S}_3$  and IS/CIS-5,10 and  $\text{CdIn}_2\text{S}_4$ .

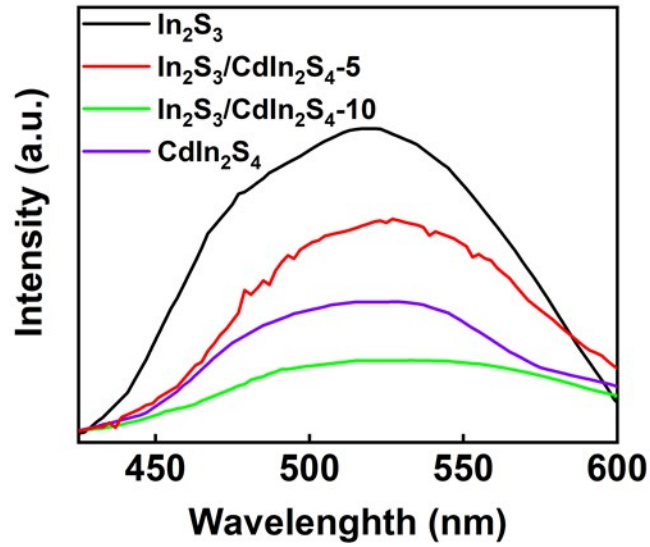

Figure S2. Photoluminescence spectra of  $\text{In}_2\text{S}_3$  and IS/CIS-5,10 and  $\text{CdIn}_2\text{S}_4$ .

S3. SEM image of IS/CIS-10-AF.

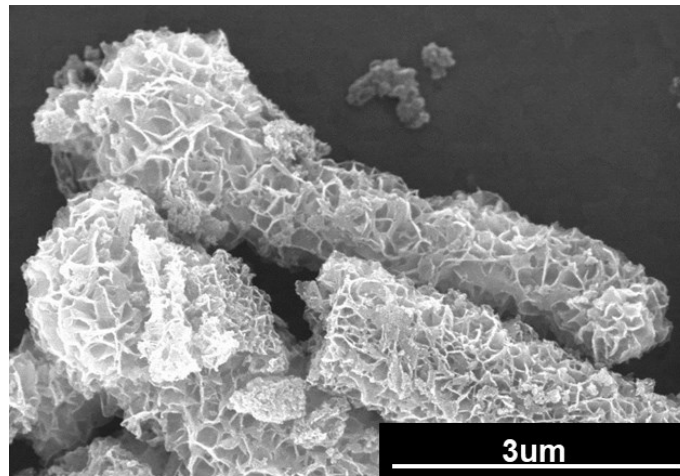

Figure S3. SEM image of IS/CIS-10-AF.

#### S4. SEM and TEM image of CdIn<sub>2</sub>S<sub>4</sub>

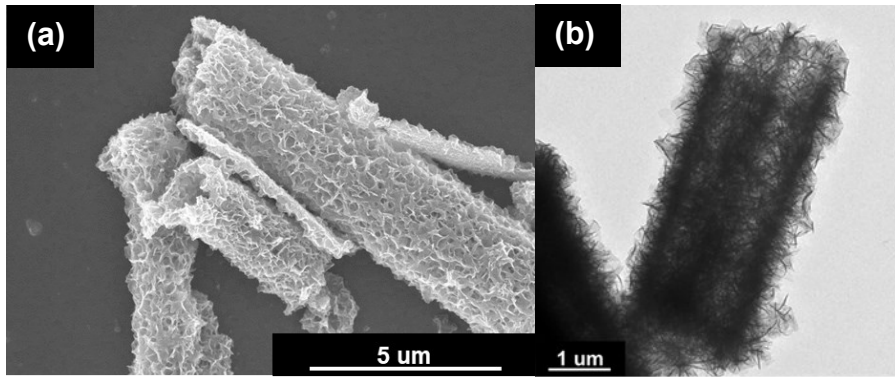

**Figure S4.** SEM and TEM images of CdIn<sub>2</sub>S<sub>4</sub>.

**Table S1**

The content of ions (Cd<sup>2+</sup>, In<sup>3+</sup> and Cr<sup>3+</sup>) after every cycling photocatalytic reduction of Cr(VI) using IS/CIS-10 sample.

| Times                   | 1        | 2        | 3        | 4        | 5        |
|-------------------------|----------|----------|----------|----------|----------|
| Cd <sup>2+</sup> (mg/L) | 0.003275 | 0.003261 | 0.002371 | 0.002819 | 0.003817 |
| In <sup>3+</sup> (mg/L) | 0.002674 | 0.003613 | 0.003112 | 0.004671 | 0.002716 |
| Cr <sup>3+</sup> (mg/L) | 0.003912 | 0.004347 | 0.002919 | 0.002518 | 0.002996 |
